# Supplementary material for: Synthesis, Characterization and Biological Activities of New Schiff Base Compound and Its Lanthanide Complexes
Source: MDPI journal article supplement (doi:10.3390/ph15040454), 2022-04-07
Supplement: s1 [file s1]

# Synthesis, Characterization and Biological Activities of New Schiff Base Compound and Its Lanthanide Complexes

Abdel-Aziz Abu-Yamin <sup>1,\*</sup>, Maisa Siddiq Abduh <sup>2,3,\*</sup>, Sultan Ayesh Mohammed Saghir <sup>4</sup> and Naif Al-Gabri <sup>5,6</sup>

<sup>1</sup>Department of Chemistry, Al-Hussein Bin Talal University, Ma'an, 71111 Jordan

<sup>2</sup>Department of Medical Laboratory Sciences, Faculty of Applied Medical Sciences, King Abdulaziz University, Jeddah 21589, Saudi Arabia

<sup>3</sup>Center of Excellence in Genomic Medicine Research, King Abdulaziz University, Jeddah 22252, Saudi Arabia

<sup>4</sup>Department of Medical Analysis. Princess Aisha Bint Al-Hussein College of Nursing and Medical Sciences, Al-Hussein Bin Talal University, Ma'an 71111, Jordan;  
Sultan.S.Ayesh@ahu.edu.jo

<sup>5</sup>Veterinary Department, Faculty of Agriculture and Veterinary Medicine, Thamar University, Dhamar 2153, Yemen; naifaljabry2014@gmail.com

<sup>6</sup>Laboratory of Salam Veterinary Group, Buraydah, Al-Qassim 51911, Saudi Arabia

- Correspondence: abuyamin@ahu.edu.jo (A.-A.A.-Y.); mabdoh@kau.edu.sa (M.S.A.); Tel.: +00962-772229226 (A.-A.A.-Y.); Tel: +00966-568026868 (M.S.A.)

## Contents:

| Figure     | Title                                      | page |
|------------|--------------------------------------------|------|
| Figure S1  | <sup>1</sup> H NMR spectrum of L in ACN.   | 2    |
| Figure S2  | <sup>13</sup> C NMR spectrum of L in ACN.  | 2    |
| Figure S3  | FTIR spectra of L, La, Lb and Lc.          | 3    |
| Figure S4  | UV-vis spectra of L, La, Lb and Lc in ACN. | 3    |
| Figure S5  | Mass spectrum of L in ACN.                 | 4    |
| Figure S6  | Mass spectrum of La in ACN.                | 4    |
| Figure S7  | Mass spectrum of Lb in ACN.                | 4    |
| Figure S8  | Mass spectrum of Lc in ACN.                | 5    |
| Figure S9  | Thermogravimetric spectrum of La           | 5    |
| Figure S10 | Thermogravimetric spectrum of Lb           | 6    |
| Figure S11 | Thermogravimetric spectrum of Lc           | 6    |

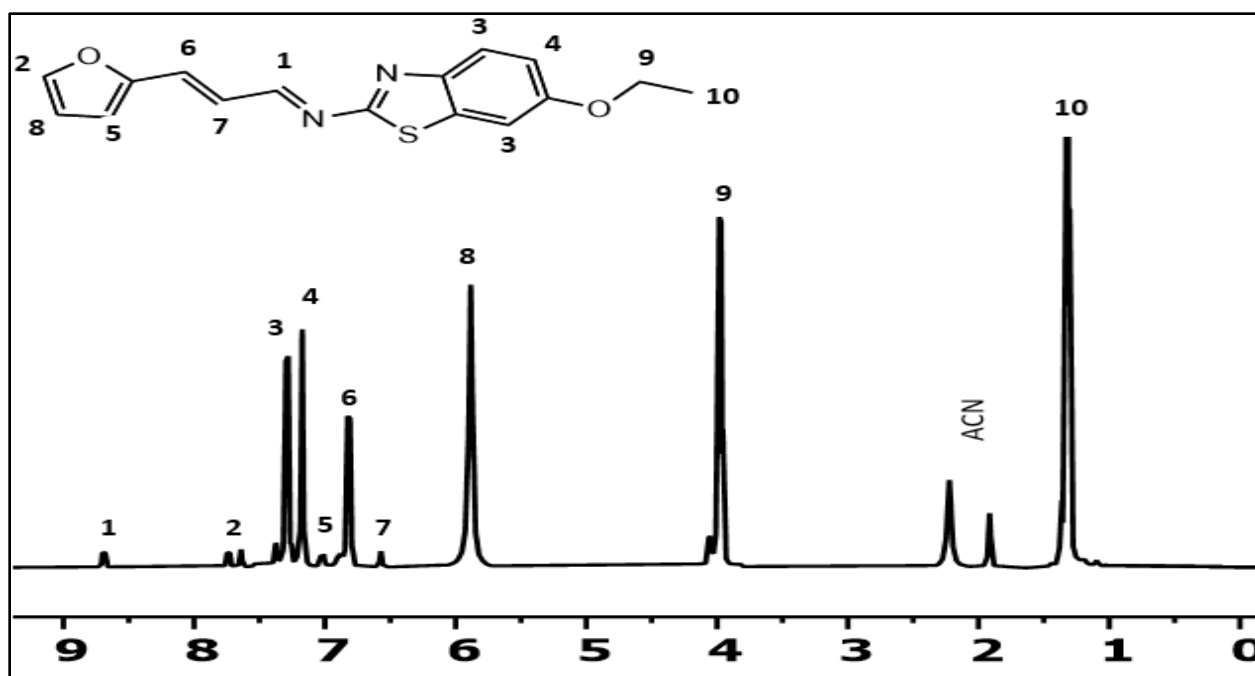

**Figure S1:** <sup>1</sup>H NMR spectrum of **L** in ACN.

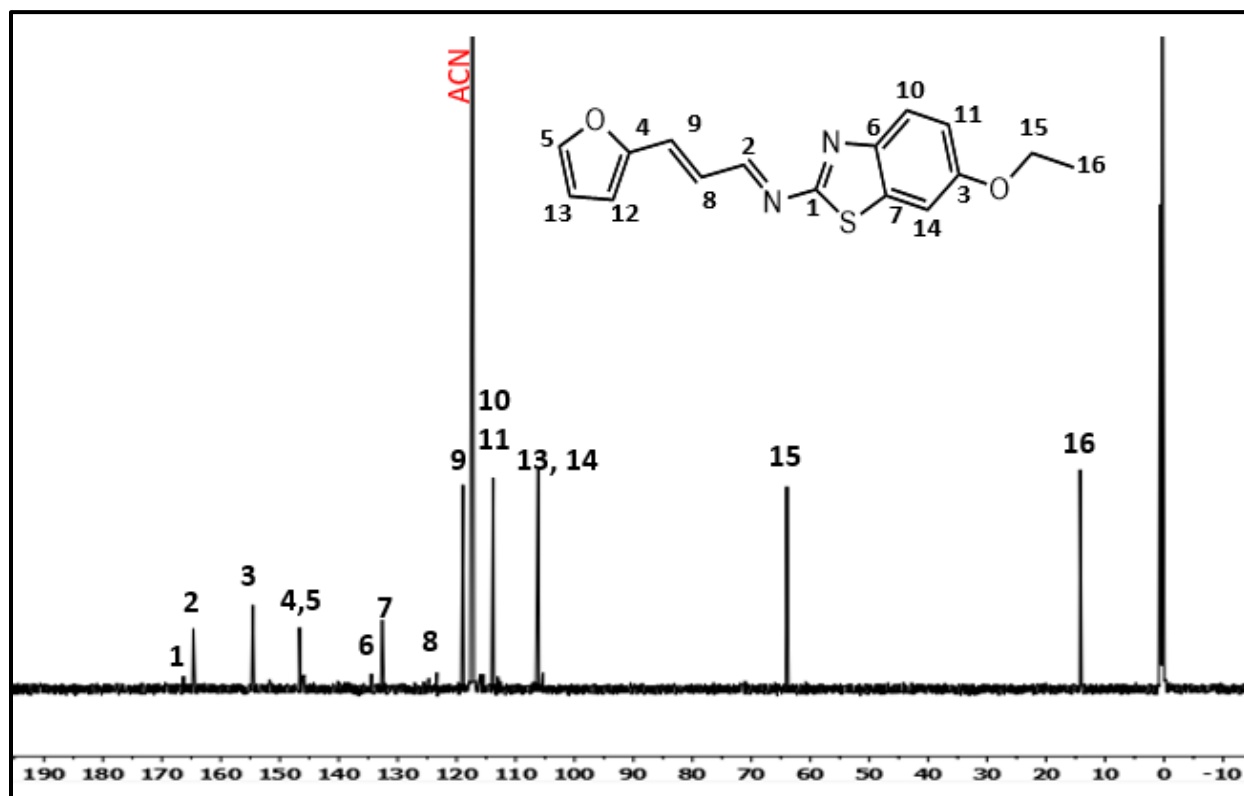

**Figure S2:** <sup>13</sup>C NMR spectrum of **L** in ACN.

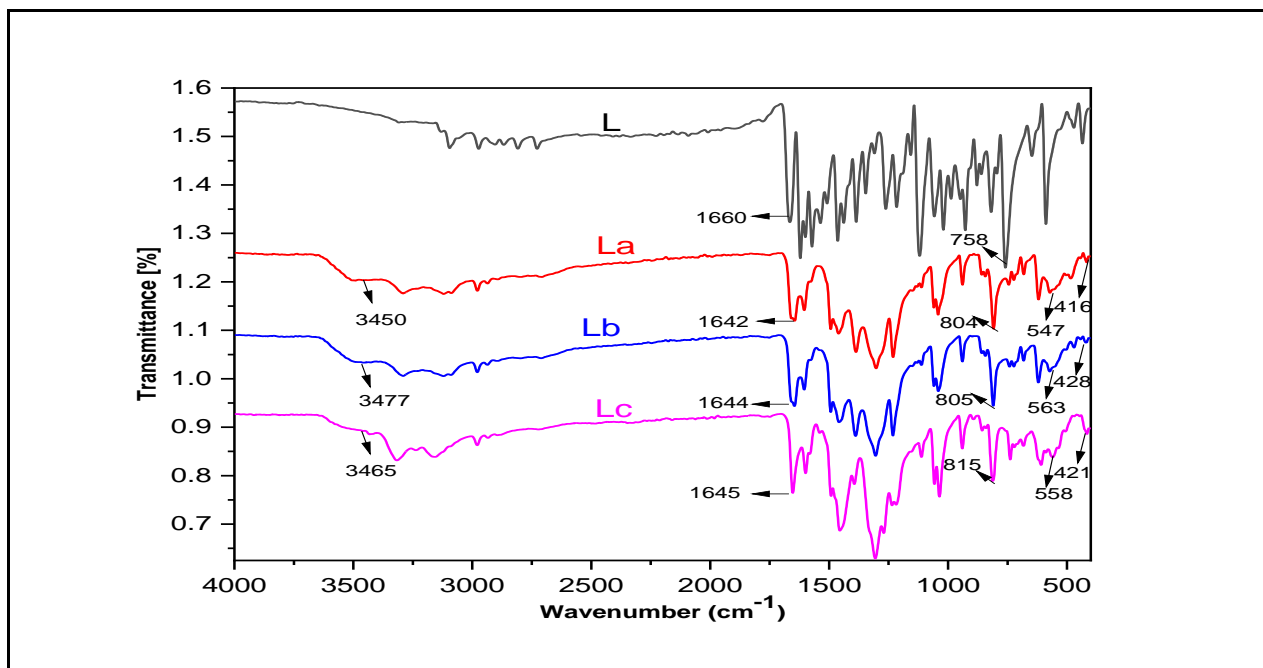

**Figure S3:** FTIR spectra of **L**, **L<sub>a</sub>**, **L<sub>b</sub>** and **L<sub>c</sub>**.

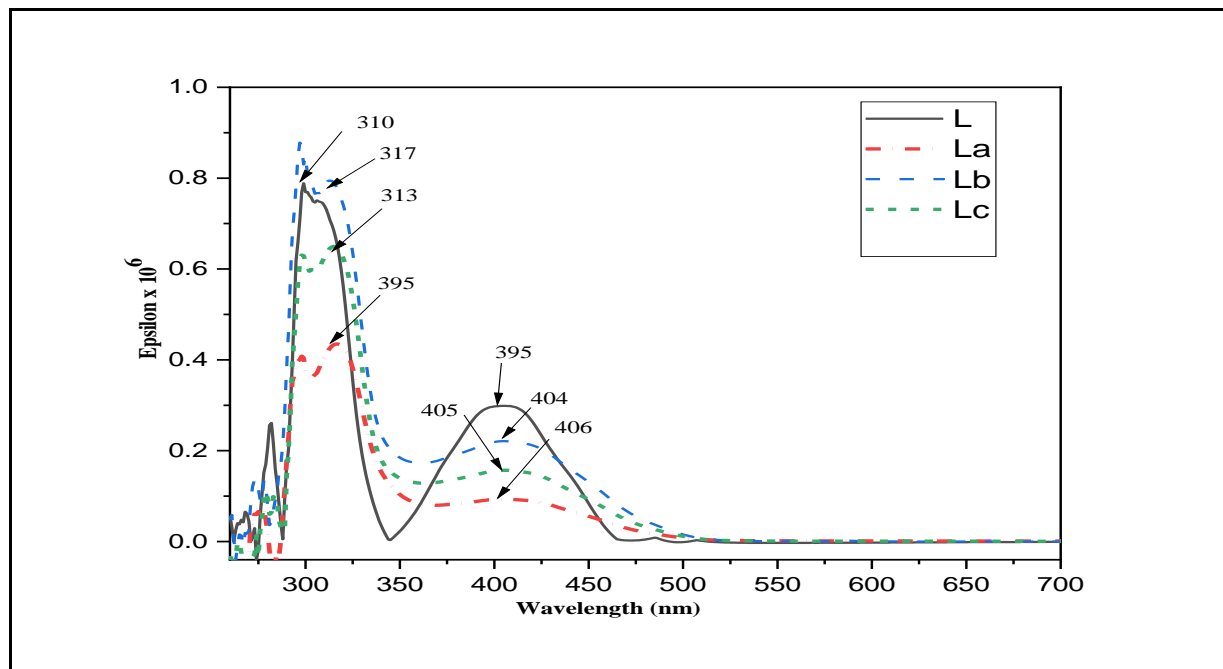

**Figure S4:** UV-vis spectra of **L**, **L<sub>a</sub>**, **L<sub>b</sub>** and **L<sub>c</sub>** in ACN.

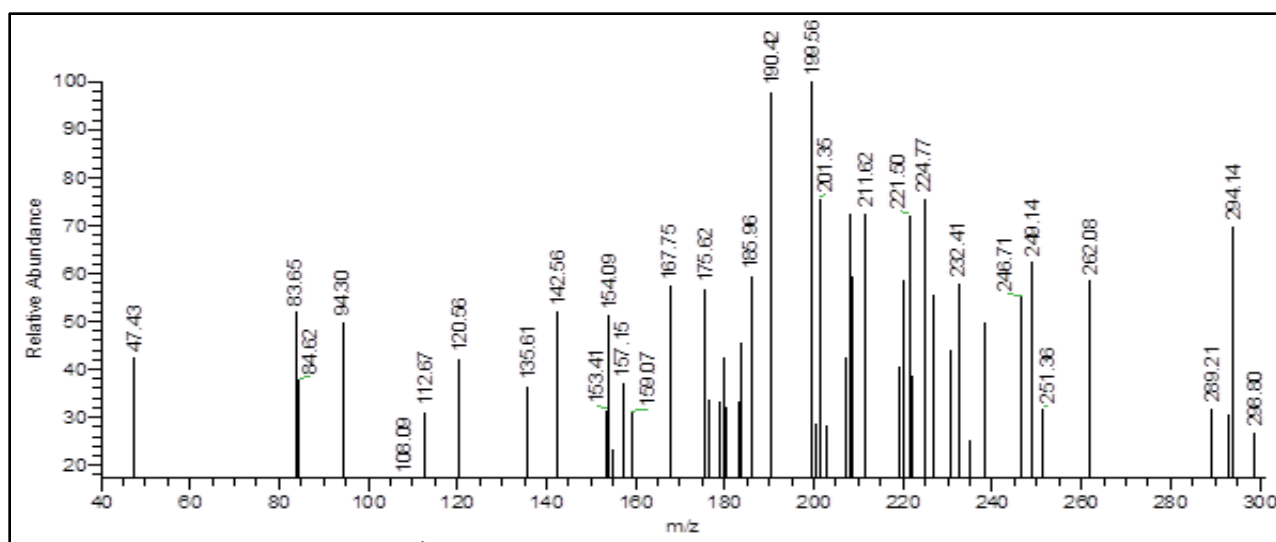

**Figure S5:** Mass spectrum of **L**.

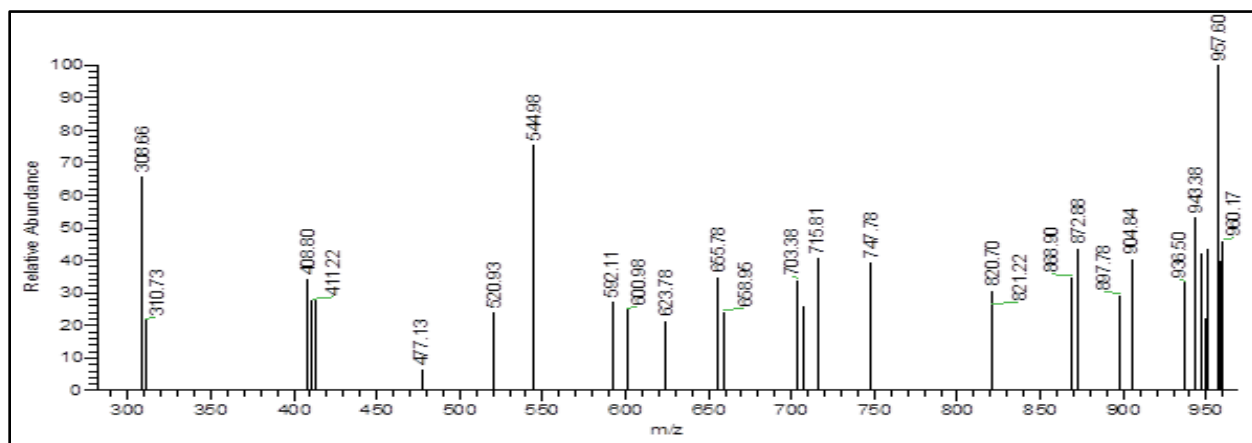

**Figure S6:** Mass spectrum of **L<sub>a</sub>**.

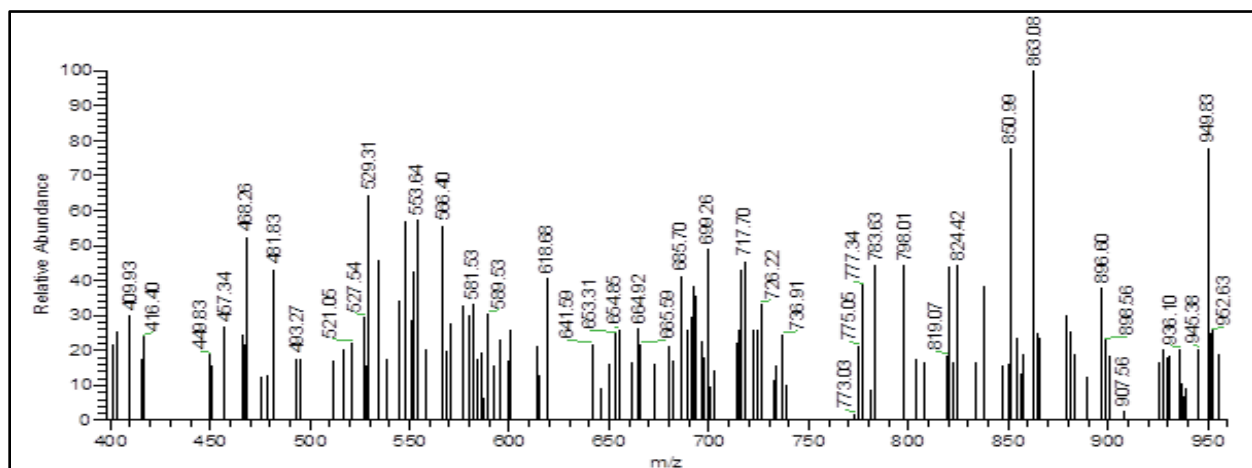

**Figure S7:** Mass spectrum of **L<sub>b</sub>**.

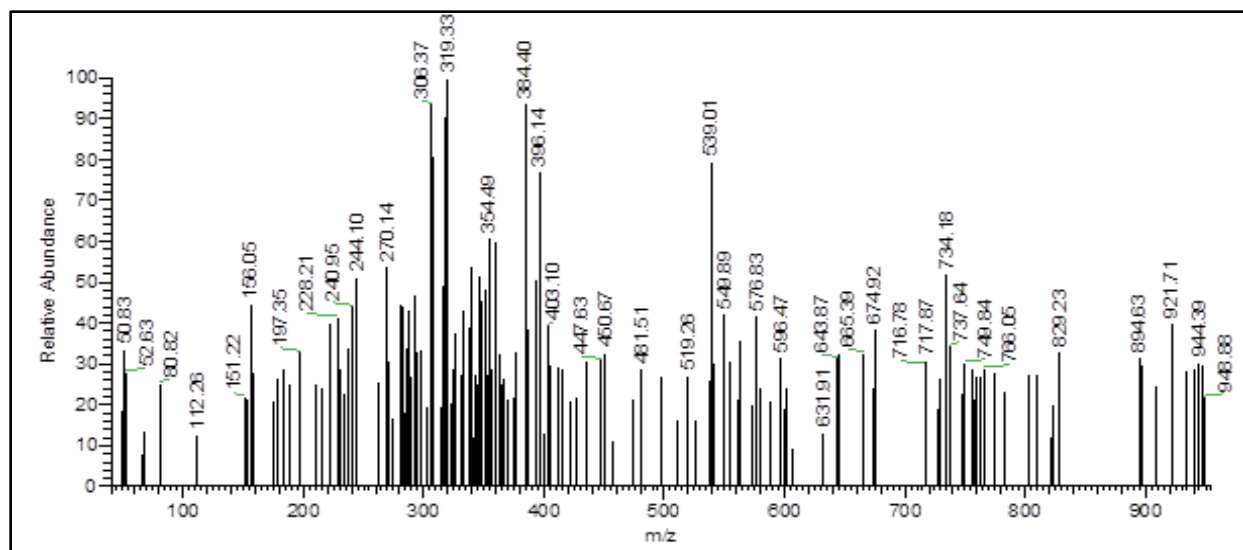

**Figure S8:** Mass spectrum of  $L_c$ .

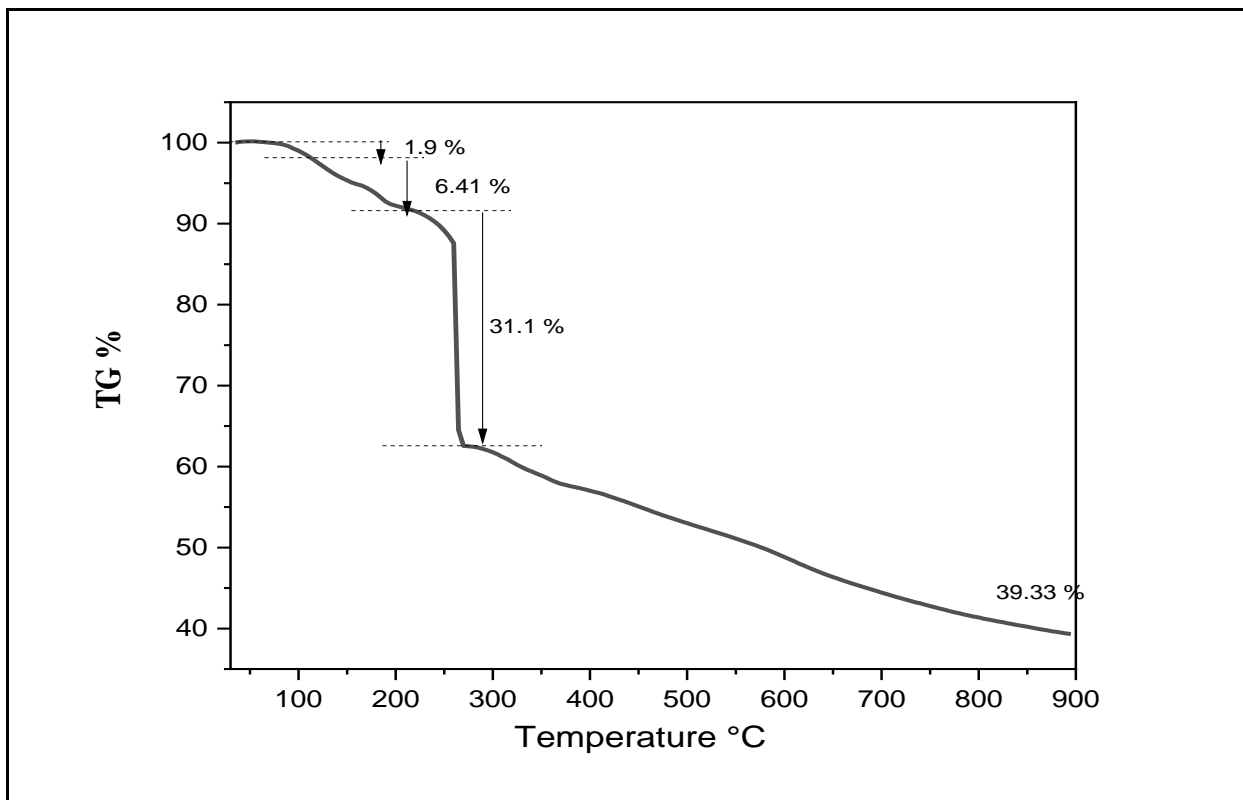

**Figure S9:** Thermogravimetric spectrum of  $L_a$

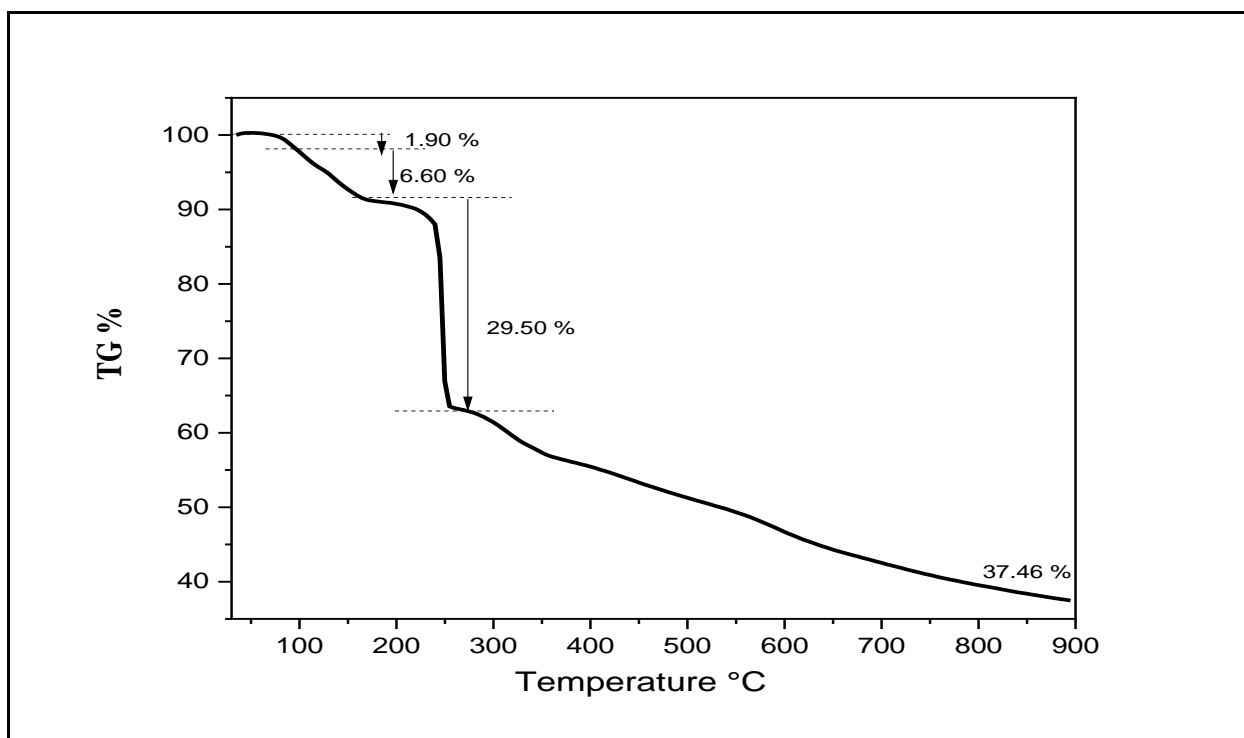

**Figure S10:** Thermogravimetric spectrum of  $L_b$

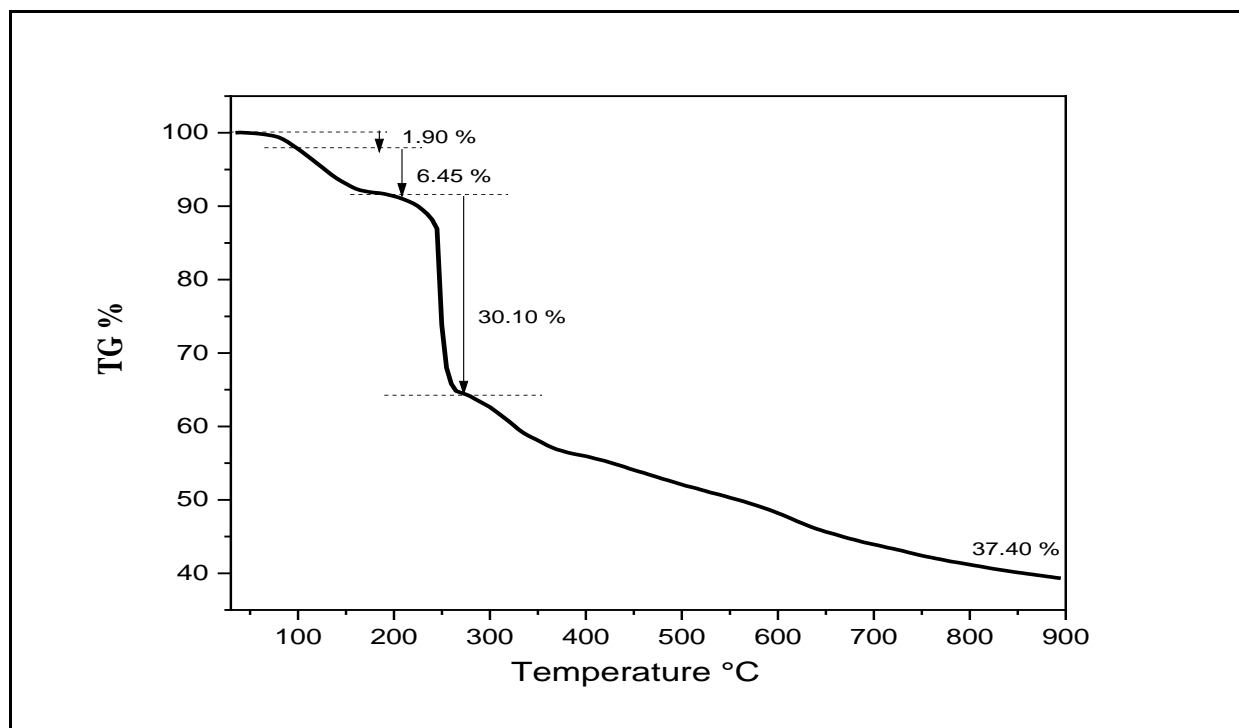

**Figure S11:** Thermogravimetric spectrum of  $L_c$
